# Supplementary material
Source: publisher site journal article supplement (https://www.dovepress.com/get_supplementary_file.php?f=303833.docx)
Supplement: Supplementary file 1 [file get_supplementary_file.php]

Supplementary Material


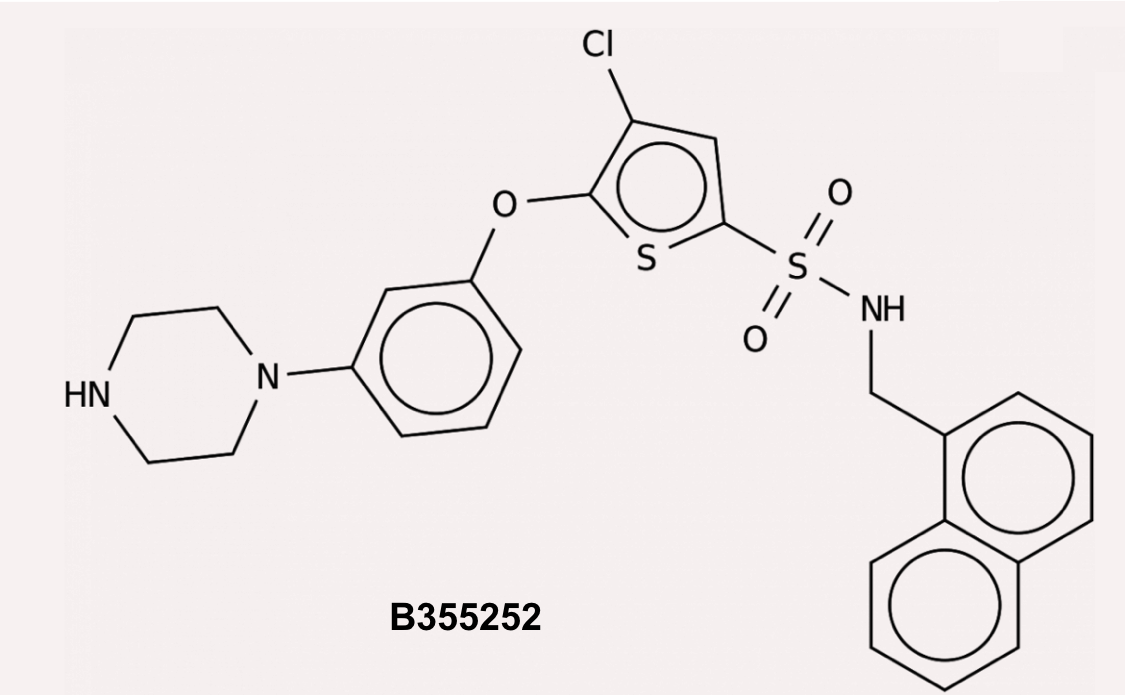


**Supplementary Figure 1. Two-D structure of B355252, a novel phenoxy thiophene small molecule.**
